# Supplementary material
Source: ML conference proceedings conference paper supplement (https://openaccess.thecvf.com/content/ICCV2025/html/Nyffeler_Hierarchical_3D_Scene_ICCV_2025_paper.html)
Supplement: Supplementary file 1 [file Nyffeler_Hierarchical_3D_Scene_ICCV_2025_supplemental.pdf]

# — Supplementary Material —

## Hierarchical 3D Scene Graphs Construction Outdoors

Jon Andri Nyffeler<sup>1</sup> Marc Pollefeys<sup>1,3</sup> Federico Tombari<sup>2</sup> Daniel Barath<sup>1,2,4</sup>

<sup>1</sup>ETH Zürich <sup>2</sup>Google <sup>3</sup>Microsoft Spatial AI Lab <sup>4</sup>HUN-REN SZTAKI

jon.nyffeler@gmail.com tombari@in.tum.de marc.pollefeys@inf.ethz.ch dbarath@ethz.ch

### A Appendix

#### A.1 Example Sub-Scene Pair

Figure 1 shows an example pair of sub-scenes from the LIN dataset used for scene alignment. The overlapping region between the two sub-scenes is highlighted in orange, with each object assigned a slightly different shade. A few objects are labeled as illustrative examples. SAligner [5] generates embeddings for each object and identifies the most similar pairs across the sub-scenes. Matched objects are connected with dotted lines for visualization.

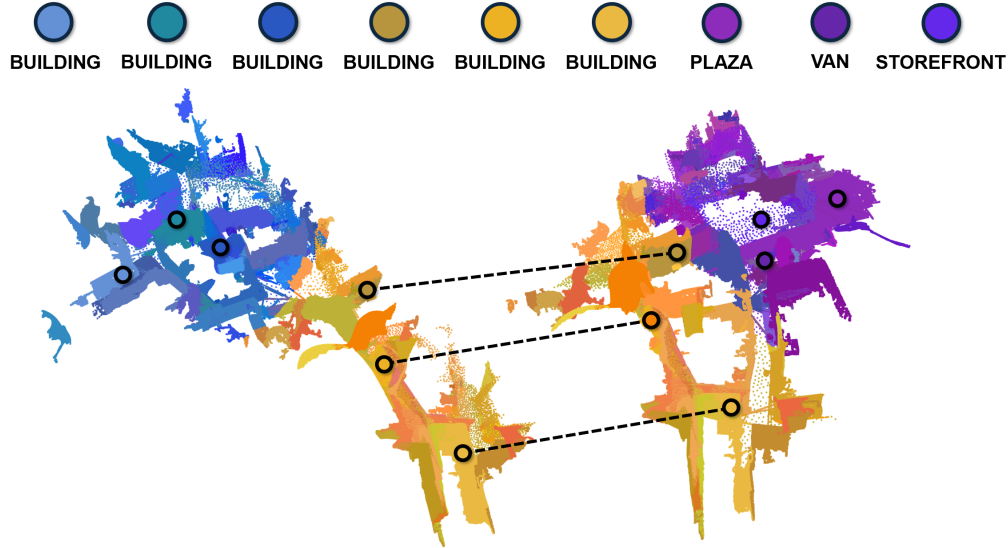

Figure 1. **Example of Object Matching for a Sub-Scene Pair.** The overlapping region is shown in orange, with distinct areas in blue and purple. Objects have slightly different tones, and selected examples are labeled with dotted lines indicating their matches.

#### A.2 LVLMs

A crucial step in 3D scene graph generation involves producing object labels, descriptions, and attributes. To achieve this, we select images of the target object, apply a red bounding box based on its SAM mask, and feed the result into a large vision-language model (LVLM) using a prompt designed to elicit detailed descriptions. In our experiments, we used GPT-4V [1] as the LVLM, although any other LVLM could be

employed. Table 1 shows an example of object description generation using several different LVLMs. Notably, GPT-4V, Gemini [3], and Claude [2] produce similarly detailed and accurate outputs. BLIP-2 [4], the only open-source model among them, also produces reasonable results, though its descriptions and attributes are generally less precise than those of the proprietary models.

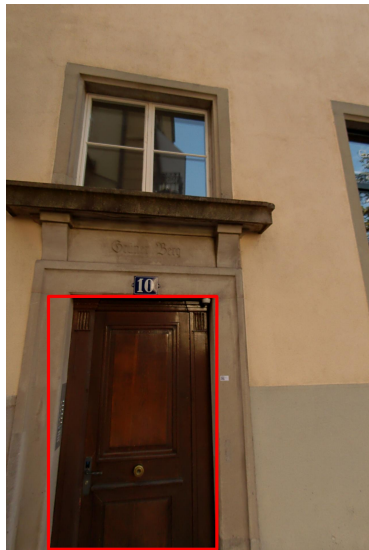

| Model  | Label | Description                                                                                                        | Attributes                                                  |
|--------|-------|--------------------------------------------------------------------------------------------------------------------|-------------------------------------------------------------|
| GPT4-V | Door  | A dark wooden door with a brass peephole and metal handle, set in a stone frame.                                   | wooden, dark, brass, handle, rectangular                    |
| BLIP2  | Door  | The door is brown                                                                                                  | open, closed, window, door, windows                         |
| Gemini | Door  | A brown wooden door with vertical panels and a brass doorknob is set within a stone frame below a building number. | brown, wooden, paneled, brass, doorknob                     |
| Claude | Door  | A wooden entrance door with paneled design, brass hardware, and a keyhole, set within a stone doorframe.           | wooden, brass, paneled, brown, entrance, solid, traditional |

Table 1. **Comparison of Different LVLMs in Object Description Generation.** A door is used as the example object. On the left, the image shows the selected object with a red bounding box derived from its SAM mask. On the right, outputs from different LVLMs are shown for label, description, and attribute generation using the same prompt.

## References

- [1] Josh Achiam, Steven Adler, Sandhini Agarwal, Lama Ahmad, Ilge Akkaya, Florencia Leoni Aleman, Diogo Almeida, Janko Altenschmidt, Sam Altman, Shyamal Anadkat, et al. Gpt-4 technical report. *arXiv preprint arXiv:2303.08774*, 2023. 1
- [2] Anthropic. Claude 3 models. <https://www.anthropic.com/news/claude-3-family>, 2024. Accessed: 2025-07-31. 2
- [3] Gheorghe Comanici et al. Gemini 2.5: Pushing the frontier with advanced reasoning, multimodality, long context, and next generation agentic capabilities, 2025. 2
- [4] Junnan Li, Dongxu Li, Silvio Savarese, and Steven Hoi. Blip-2: Bootstrapping language-image pre-training with frozen image encoders and large language models, 2023. 2
- [5] Sayan Deb Sarkar, Ondrej Miksik, Marc Pollefeys, Daniel Barath, and Iro Armeni. Sgaligner: 3d scene alignment with scene graphs. In *Proceedings of the IEEE/CVF International Conference on Computer Vision*, pages 21927–21937, 2023. 1
